# Supplementary material for: Kinetic analysis of aqueous-phase cyclodehydration of 1,4-butanediol and erythritol over a layered niobium molybdate solid acid
Source: Royal Society of Chemistry journal article supplement (doi:10.1039/c5cy01126d), 2015-08-24
Supplement: c5cy01126d1.pdf [file c5cy01126d1.pdf]

Supplementary Information for

**Kinetic Analysis of Aqueous-phase Cyclodehydration of 1,4-Butanediol and Erythritol over a Layered Niobium Molybdate Solid Acid**

Atsushi Takagaki\*

*Department of Chemical System Engineering, School of Engineering, The University of Tokyo,  
7-3-1 Hongo, Bunkyo-ku, Tokyo 113-8656, Japan*

**Mass transfer limitation**

In the liquid-phase reaction, it is necessary to ascertain that no mass transfer limitations occur. For the highest reaction rates, mass transfer calculations were carried out. The Weisz-Prater criterion is useful to judge the absence of the internal diffusion limitations.

$$C_{WP} = \frac{-r'_{A(obs)} \rho_c R^2}{D_e C_{AS}} < 1 \quad (11)$$

In this equation,  $-r'_{A(obs)}$  is the observed reaction rate [kmol/kg-cat·s],  $\rho_c$  is the solid catalyst density [kg/m<sup>3</sup>],  $R$  is the catalyst particle radius [m], and  $C_{AS}$  is the concentration of substrate A at the catalyst surface [kmol-A/m<sup>3</sup>]. Also,  $D_e$  is the effective diffusivity [m<sup>2</sup>/s], which is equal to  $(D_{AB} \phi_p \sigma_c)/\tau$  where  $D_{AB}$  is the diffusivity [m<sup>2</sup>/s],  $\phi_p$  is the catalyst porosity [-],  $\sigma_c$  is the constriction factor [-], and  $\tau$  is the tortuosity [-]. For cyclodehydration of 1,4-butanediol, the highest reaction rates over HNbMoO<sub>6</sub>, Amberlyst-15 and H-ZSM5,  $-r'_{A(obs)}$ , were  $6.9 \times 10^{-6}$ ,  $6.4 \times 10^{-6}$  and  $3.6 \times 10^{-6}$  [kmol/kg-cat·s], respectively. Other quantities for the three catalysts are listed in Table S1. The concentration  $C_{AS}$  and diffusivity  $D_{AB}$  of 1,4-butanediol were 3.3 [kmol/m<sup>3</sup>] and  $5 \times 10^{-9}$  [m<sup>2</sup>/s].<sup>S1</sup> The values of  $C_{WP}$  were calculated to be  $2.6 \times 10^{-3}$ ,  $1.3 \times 10^{-2}$  and  $3.6 \times 10^{-3}$  for HNbMoO<sub>6</sub>, Amberlyst-15 and H-ZSM5, respectively. For the case of cyclodehydration of erythritol, the values of  $C_{WP}$  were obtained to be  $3.9 \times 10^{-4}$ ,  $1.9 \times 10^{-3}$  and  $6.0 \times 10^{-4}$  for HNbMoO<sub>6</sub>, Amberlyst-15 and H-ZSM5, respectively. Since these values are  $\ll 1$ , internal mass transfer effects can be neglected.

**Table S1** Quantities used for estimation of the Weisz-Prater Criterion in the three catalysts

| Catalyst            | Particle radius, R /m | Density, $\rho_c$ /kg m <sup>-3</sup> | Porosity, $\phi_p$ | Constriction factor, $\sigma_c$ | Tortuosity, $\tau$ |
|---------------------|-----------------------|---------------------------------------|--------------------|---------------------------------|--------------------|
| HNbMoO <sub>6</sub> | $5 \times 10^6$       | $1.0 \times 10^3$                     | 0.4 <sup>a</sup>   | 1                               | 1                  |
| Amberlyst-15        | $5 \times 10^6$       | $1.2 \times 10^3$                     | 0.32               | 0.8 <sup>a</sup>                | 3.0 <sup>a</sup>   |
| H-ZSM5              | $5 \times 10^6$       | $0.7 \times 10^3$                     | 0.4 <sup>a</sup>   | 0.8 <sup>a</sup>                | 3.0 <sup>a</sup>   |

<sup>a</sup> Typical values of porosity, constriction factor and tortuosity are 0.4, 0.8 and 3.0, respectively.<sup>S2</sup> These values were used.

[References]

[S1] T. Tominaga and S. Matsumoto, *Bull. Chem. Soc. Jpn.*, 1990, **63**, 533.

[S2] H.S. Fogler, "Elements of Chemical Reaction Engineering", Pearson Education Inc., 2010, p.816.
